# Supplementary material for: Classification and analysis of a large collection of in vivo bioassay descriptions
Source: PubMed Central journal article supplement (PMC5517062; doi:10.1371/journal.pcbi.1005641), 2017-07-05
Supplement: pcbi.1005641.s002.pdf [file pcbi.1005641.s002.pdf]

## Supplementary information: SQL queries

ChEMBL (version 21) was downloaded from the database's ftp website and loaded into a local MySQL database. Following SQL queries were used to retrieve the data used in the analyses and to retrieve statistics reported in the dataset description section.

### 1 Dataset retrieval: basic information about assays and the associated publications

```
SELECT
  a.chembl_id AS assay_chemblid
  , a.description AS assay_description
  , c.pref_name AS species
  , b.chembl_id AS doc_chemblid
  , b.pubmed_id AS doc_pubmed_id
  , b.year AS publication_year
  , b.journal AS publication_journal
FROM
  assays a
  JOIN docs b ON a.doc_id = b.doc_id
  JOIN target_dictionary c ON a.tid = c.tid
WHERE
  a.assay_type = 'F'
  and b.doc_type = 'PUBLICATION'
  and c.pref_name in ('Mus musculus', 'Rattus norvegicus')
```

### 2 Dataset retrieval: Information about compounds tested in each assay

```
SELECT
  a.chembl_id AS assay_chemblid
```

```

, e.chembl_id AS compound_chembl_id
, LCASE(e.pref_name) AS compound_name
, IF(e.max_phase = 4, 'Yes', 'No') AS approved_drug_flag
, GROUP_CONCAT(f.level5 separator ';') AS atc_codes
FROM
  assays a
  JOIN docs b ON a.doc_id = b.doc_id
  JOIN target_dictionary c ON a.tid = c.tid
  JOIN activities d ON a.assay_id = d.assay_id
  JOIN molecule_dictionary e ON d.molregno = e.molregno
  LEFT JOIN molecule_atc_classification f ON d.molregno = f.molregno
WHERE
  a.assay_type = 'F'
  AND b.doc_type = 'PUBLICATION'
  AND c.pref_name in ('Mus musculus', 'Rattus norvegicus')
GROUP BY
  a.chembl_id, e.chembl_id, e.pref_name, approved_drug
ORDER BY assay_chemblid

```

### 3 Dataset retrieval: Information about biological targets of other assays reported in the same publication

```

SELECT
  a1.chembl_id AS in_vivo_assay_chemblid
, b.chembl_id AS doc_chemblid
, a2.chembl_id AS other_assay_chemblid
, a2.assay_type AS other_assay_type
, c2.pref_name AS other_target
, c2.target_type AS other_target_type
FROM
  assays a1
  JOIN docs b ON a1.doc_id = b.doc_id
  JOIN target_dictionary c1 ON a1.tid = c1.tid
  JOIN assays a2 ON b.doc_id = a2.doc_id
  JOIN target_dictionary c2 ON a2.tid = c2.tid
WHERE
  a1.assay_type = 'F'
  AND a2.assay_type IN ('B', 'F')

```

```

AND b.doc_type = 'PUBLICATION'
AND c1.pref_name IN ('Mus musculus', 'Rattus norvegicus')
AND c2.pref_name NOT IN ('Mus musculus', 'Rattus norvegicus')
AND c2.target_type != 'UNCHECKED'
ORDER BY a1.chembl_id

```

#### 4 Dataset statistics: Number of all compounds in ChEMBL

```

SELECT
    COUNT(DISTINCT molregno)
FROM
    activities

```

#### 5 Dataset statistics: Number of all assays extracted from publications

```

SELECT
    COUNT(DISTINCT a.assay_id)
FROM
    assays a
    JOIN docs b ON a.doc_id = b.doc_id
WHERE
    b.doc_type = 'PUBLICATION'

```

#### 6 Dataset statistics: Assay type distribution

```

SELECT
    a.assay_type
    , COUNT(*) as count
FROM
    assays a
    JOIN docs d ON a.doc_id = d.doc_id
WHERE
    a.assay_type != 'None'
    and d.doc_type = 'PUBLICATION'
GROUP BY
    a.assay_type

```

## 7 Dataset statistics: Assay and target type distribution

```
SELECT
  a.assay_type
  , b.target_type
  , COUNT(*) as count
FROM
  assays a
  JOIN target_dictionary b ON a.tid = b.tid
  JOIN docs d ON a.doc_id = d.doc_id
WHERE
  d.doc_type = 'PUBLICATION'
GROUP BY
  a.assay_type, b.target_type
```

## 8 Dataset statistics: Animal species used in *in vivo* efficacy assays and their taxonomic classification

```
SELECT
  b.pref_name AS species
  , b.tax_id AS tax_id
  , d.l1 AS level1_classification
  , d.l2 AS level2_classification
  , d.l3 AS level3_classification
  , COUNT(*) as assay_count
FROM
  assays a
  JOIN target_dictionary b ON a.tid = b.tid
  JOIN docs c ON a.doc_id = c.doc_id
  JOIN organism_class d ON b.tax_id = d.tax_id
WHERE
  a.assay_type = 'F'
  AND b.target_type = 'ORGANISM'
  AND c.doc_type = 'PUBLICATION'
  AND d.l1 = 'Eukaryotes'
  AND d.l2 IN ('Amphibia', 'Annelida', 'Arthropoda', 'Aves',
              'Echinodermata', 'Lepidosauria', 'Mammalia',
```

```
        'Mollusca', 'Nematoda', 'Platyhelminthes', 'Teleostei')
AND pref_name != 'Homo sapiens'
GROUP BY
    b.pref_name, b.tax_id, d.l1, d.l2, d.l3
```
